# Supplementary material
Source: Springer Nature journal article supplement (https://www.springermedizin.de/resource/supplementary/12950_2013_362_MOESM4_ESM.pdf/9557662)

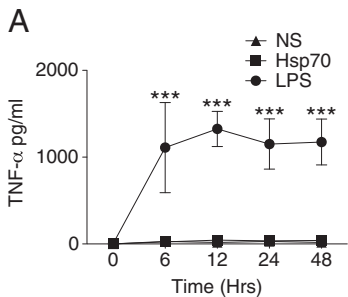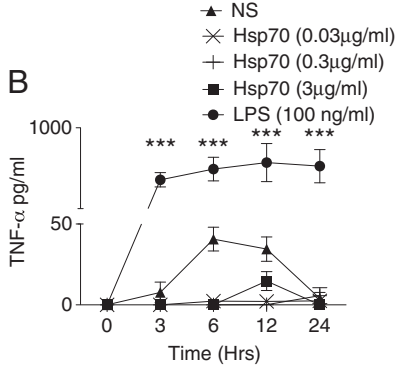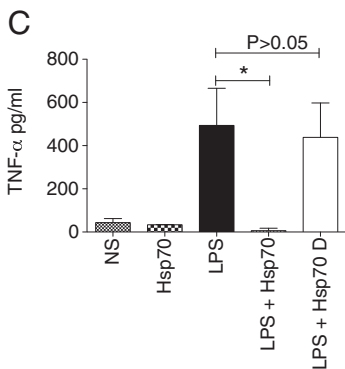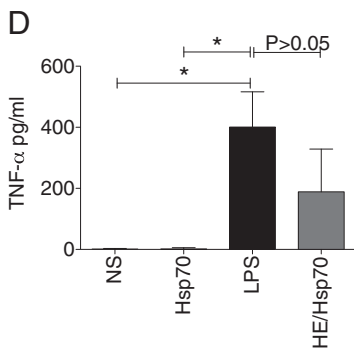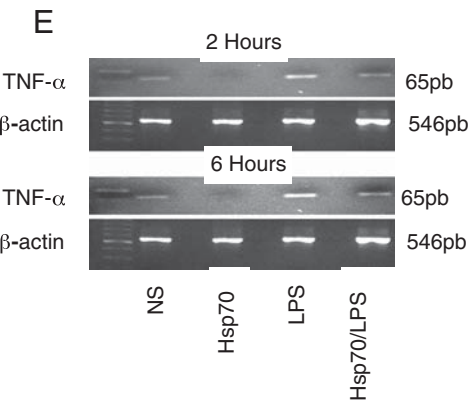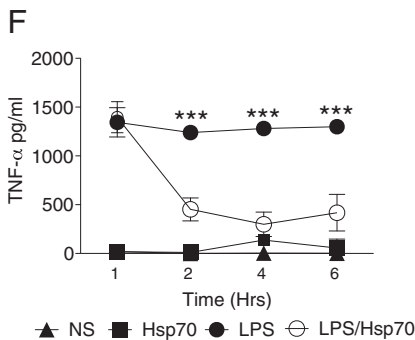

Supplement: MOESM4 [file 9557662]
